# Supplementary material for: Unveiling the Risks and Outcomes of Preeclampsia: A Case-Control Study in the UAE
Source: Research Square preprint supplement (doi:10.21203/rs.3.rs-7106149/v1), 2025-08-29
Supplement: Supplementary file 1 [file 673cff8b20bacaf500b874be.docx]

**Title: Unveiling the Risks and Outcomes of Preeclampsia: A Case-Control Study in the UAE.**

**Questionnaire:-**

1. **Sociodemographic Characteristics:**
2. Age: ______
3. Nationality: _________
4. Marital Status:

- Married
- Divorced
- Widow

1. Education level:

- High school or below
- Diploma
- Undergraduate
- Postgraduate

1. Employment status:

- Yes
- No

1. If yes, please specify your job title: ____________
2. Height (in cm): _________
3. Weight (in kg): _________

**The question that differentiates between cases and controls:**

1. Do you have preeclampsia (high blood pressure during your pregnancy) currently?

- Yes
- No

1. **Past Medical History:**
2. Do you have any of the following reproductive health conditions:

| **Reproductive Health History** | **Yes** | **No** |
| --- | --- | --- |
| 1. Menstrual disorders like dysmenorrhea, menorrhagia, amenorrhea, irregular menstrual cycles |  |  |
| 1. PCOS (Polycystic ovary syndrome) |  |  |
| 1. Endometriosis |  |  |
| 1. Uterine abnormalities like fibroids, a septate uterus, intrauterine adhesions |  |  |
| 1. Pelvic inflammatory disease |  |  |
| 1. Sexually transmitted infections |  |  |
| 1. Cancers such as ovarian cancer, uterine cancer, cervical cancer |  |  |

If others, please specify: ____________________

1. Do you have any of the following medical conditions:

| **Medical History** | **Yes** | **No** |
| --- | --- | --- |
| 1. Hypertension (high blood pressure before pregnancy) |  |  |
| 1. Diabetes (high blood sugar before pregnancy) |  |  |
| 1. High Cholesterol |  |  |
| 1. Thyroid disorders |  |  |
| 1. Cardiovascular disease |  |  |
| 1. Autoimmune disease |  |  |
| 1. Blood transfusion |  |  |
| 1. Iron deficiency anemia |  |  |
| 1. Thrombosis |  |  |
| 1. Allergy |  |  |

If others, please specify: ____________________

1. **Past Surgical History:**
2. Did you have any history of invasive procedures, surgeries, or therapies such as:

| **Surgical History** | **Yes** | **No** |
| --- | --- | --- |
| 1. Dilation and curettage |  |  |
| 1. Abdominal or Pelvic Surgeries (e.g., Caesarean section (C-section), hysterectomy, myomectomy, ovarian cyst removal, or endometriosis surgery) |  |  |
| 1. Endometrial biopsy |  |  |
| 1. Chemotherapy or radiotherapy |  |  |
| 1. Others (kidney, heart, bariatric, vascular, or organ transplant surgeries) |  |  |

If others, please specify: ____________________

1. **Family History:**
2. Do you have any family history of hypertension (high blood pressure)?

- Yes
- No

1. If yes, who among your family has it? _________
2. **Obstetric History:**
3. Number of pregnancies (Gravida): _________
4. Pregnancy more than 20 weeks (Para): ___________
5. Number of living children: ___________
6. Number of abortions: __________
7. Age at the first pregnancy: __________
8. Do you have a twin or triplet?

- Yes
- No

1. What is the birth weight of your recent child/ children (in kgs)? _________
2. What was the mode of your deliveries (Normal vaginal, assisted vaginal, C-section, induced, VBAC (vaginal birth after caesarean section), etc): __________________
3. What was the gestational age of your baby at birth? (OR in other words, how many weeks was your baby born, e.g., 29 weeks, 30 weeks, etc)?

- Preterm (<37 weeks)
- Term (37-41 weeks)
- Post-term (>42 weeks)

1. Which week of pregnancy (gestation) are you in: ____________
2. Did you undergo any fertility treatments or procedures (e.g., ART, IVF).

- Yes
- No

1. If yes, please specify what treatment method was used for conceiving: ___________
2. Before getting pregnant, did you use any contraceptive methods?

- Yes
- No

1. If yes, then please specify: ____________________
2. Did you take any medications to control your blood pressure (BP)? (Only those with preeclampsia in their current or previous pregnancy)

- Yes
- No

1. History of any of the following during previous pregnancy:

- Maternal: Did you have any of the following?

| **Medical History** | **Yes** | **No** |
| --- | --- | --- |
| 1. Persistent Hypertension (persistent high blood pressure) |  |  |
| 1. Gestational Diabetes (high blood sugar during pregnancy) |  |  |
| 1. Postpartum Depression |  |  |

If others, please specify: ____________________

- Fetal: Did your child have any of the following after birth?

| **Medical History** | **Yes** | **No** |
| --- | --- | --- |
| 1. Preterm birth |  |  |
| 1. Amniotic fluid abnormalities (Oligohydroamnios/ Polyhydramnios) |  |  |
| 1. Placental abnormalities (Premature rupture of membrane, Placenta previa, etc.) |  |  |
| 1. Placenta abruption |  |  |
| 1. Respiratory distress syndrome |  |  |
| 1. Stillbirth |  |  |
| 1. Intrauterine growth restrictions |  |  |
| 1. Chromosomal anomalies |  |  |

If others, please specify: ____________________

1. **Personal History:**
2. Do you do any exercises during your pregnancy?

- Yes
- No

1. If yes, how often do you do it?

- Everyday
- 3-5 times a week
- Rarely
- Not applicable

1. Rate your stress level during pregnancy on a scale of 0-10 (where 0 = no stress, 10 = high stress):

0 1 2 3 4 5 6 7 8 9 10

1. What was your regular diet during your pregnancy?

- Nutritious food (fruits and vegetables)
- Junk food
- Mixed

1. Did you smoke before becoming pregnant?

- Yes
- No

1. If yes, then how often: ____________
2. Did you consume alcohol before becoming pregnant?
   - Yes
   - No
3. If yes, then how often: ____________
4. Did you take any recreational drugs like amphetamines, cocaine, or phencyclidine?
   - Yes
   - No
